# Supplementary material for: High Resolution Genome Wide Binding Event Finding and Motif Discovery Reveals Transcription Factor Spatial Binding Constraints
Source: PubMed Central journal article supplement (PMC3415389; doi:10.1371/journal.pcbi.1002638), 2012-08-09
Supplement: pcbi.1002638.s024.pdf [file pcbi.1002638.s024.pdf]

**Table S7 Non-redundant significant pairwise spatial binding constraints detected from mouse ES cell ChIP-Seq data, consolidated to non-redundant factor pairs**

| TF1   | TF2      | Most significant spacing |
|-------|----------|--------------------------|
| Ctcf  | E2f1     | 6                        |
| Ctcf  | Esrrb    | 57                       |
| Ctcf  | Klf4     | 9                        |
| Ctcf  | Tcfcp2l1 | 2                        |
| E2f1  | Klf4     | 3                        |
| E2f1  | Zfx      | 6                        |
| E2f1  | c-Myc    | 3                        |
| E2f1  | n-Myc    | 1                        |
| Esrrb | Klf4     | 31                       |
| Esrrb | Nanog    | 58                       |
| Esrrb | Nr5a2    | 1                        |
| Esrrb | Oct4     | 24                       |
| Esrrb | Sox2     | 56                       |
| Esrrb | Tcfcp2l1 | 10                       |
| Esrrb | n-Myc    | 23                       |
| Klf4  | Nanog    | 24                       |
| Klf4  | Nr5a2    | 30                       |
| Klf4  | Oct4     | 27                       |
| Klf4  | Sox2     | 25                       |
| Klf4  | Tcfcp2l1 | 41                       |
| Klf4  | Zfx      | 5                        |
| Klf4  | c-Myc    | 1                        |
| Klf4  | n-Myc    | 1                        |
| Nanog | Nr5a2    | 57                       |
| Nanog | Oct4     | 7                        |
| Nanog | P300     | 2                        |
| Nanog | Smad1    | 1                        |
| Nanog | Sox2     | 1                        |
| Nanog | Tcfcp2l1 | 65                       |
| Nr5a2 | Sox2     | 58                       |
| Nr5a2 | Tcfcp2l1 | 11                       |
| Nr5a2 | Zfx      | 0                        |
| Oct4  | Sox2     | 6                        |
| P300  | Sox2     | 1                        |
| Smad1 | Sox2     | 0                        |
| Sox2  | Tcfcp2l1 | 66                       |
| c-Myc | n-Myc    | 0                        |

Total count: 37
