# Supplementary material for: High Resolution Genome Wide Binding Event Finding and Motif Discovery Reveals Transcription Factor Spatial Binding Constraints
Source: PLOS journal article supplement (doi:10.1371/journal.pcbi.1002638), 2012-08-09

## Figure S2 GEM improves the spatial resolution of Reb1 ChIP-exo data event prediction.

**A)** Fraction of predicted Reb1 binding events with a motif within the given distance with event discovery by GEM, GPS, and the peak-pair midpoint method of Rhee, et al. GEM and GPS are initialized with a ChIP-Seq read distribution. **B)** GEM automatically adapts to the Reb1 ChIP-exo read spatial distribution.

**A**

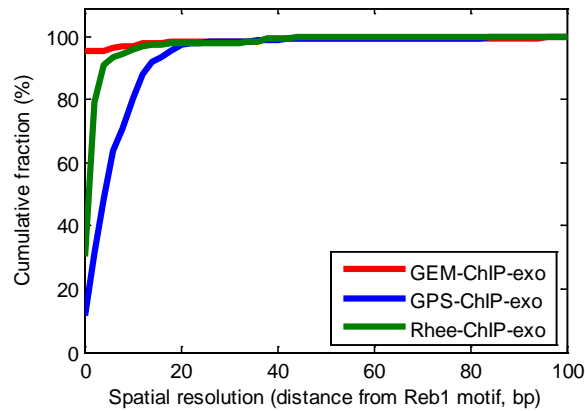

**B**

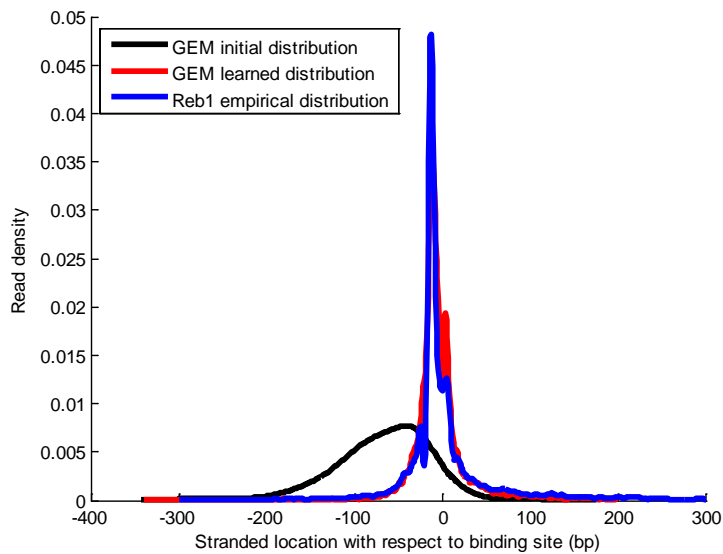

Supplement: S5 (10.1371/journal.pcbi.1002638.s005) [file journal.pcbi.1002638.s005]
