# Supplementary material for: High Resolution Genome Wide Binding Event Finding and Motif Discovery Reveals Transcription Factor Spatial Binding Constraints
Source: PLOS journal article supplement (doi:10.1371/journal.pcbi.1002638), 2012-08-09

**Figure S12 Color chart representation of 100bp sequences in 315 regions with 4bp CTCF/Egr1 binding constraint**

Each row represents a 100bp bound sequence. Green, blue, yellow and red indicate A, C, G and T. The motif logos are generated by STAMP [19] from the motifs discovered using all the binding sites in the respective datasets.

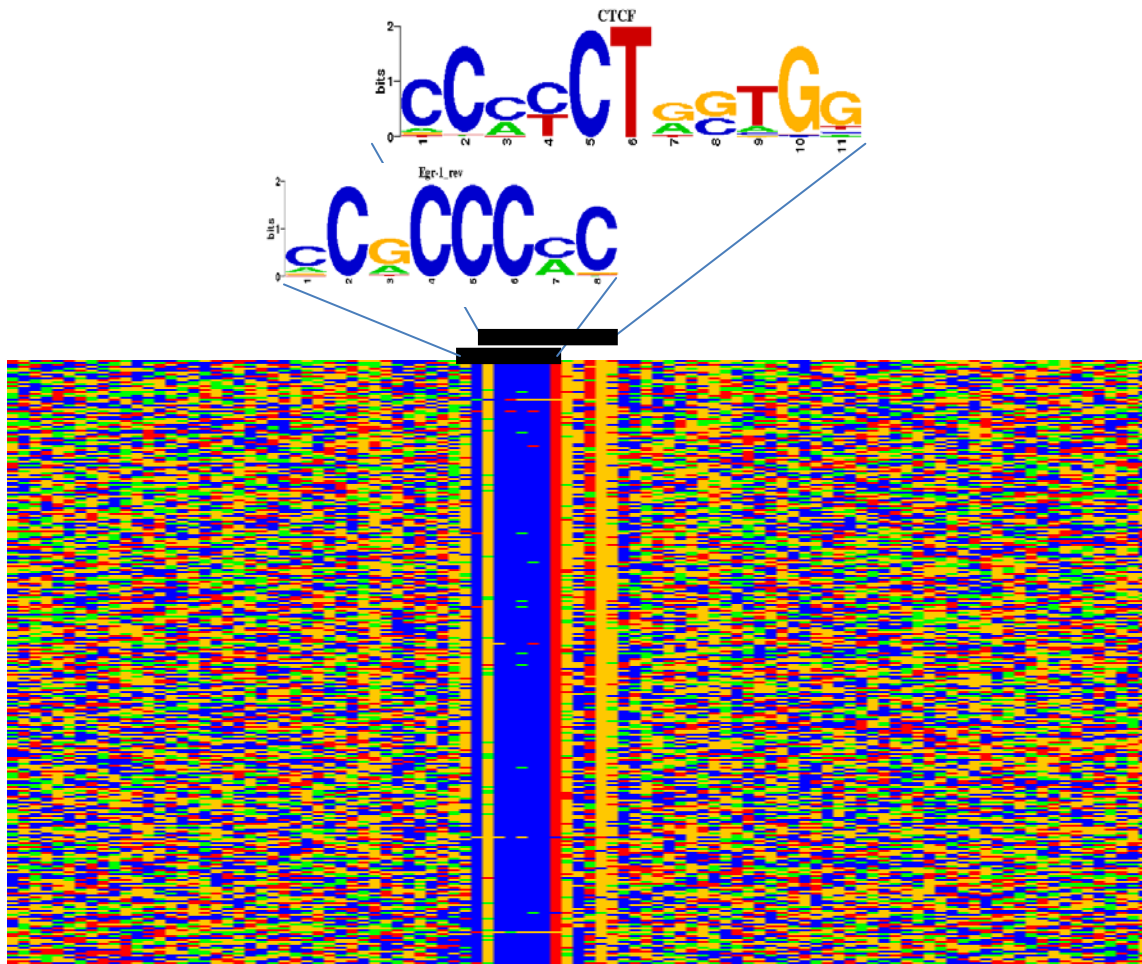

Supplement: S15 (10.1371/journal.pcbi.1002638.s015) [file journal.pcbi.1002638.s015]
