# Supplementary material for: High Resolution Genome Wide Binding Event Finding and Motif Discovery Reveals Transcription Factor Spatial Binding Constraints
Source: PLoS Comput Biol. 2012 Aug 9;8(8):e1002638. doi: 10.1371/journal.pcbi.1002638 (PMC3415389; doi:10.1371/journal.pcbi.1002638)
Supplement: Table S2 — Performance of motif discovery methods by individual ENCODE ChIP-Seq experiments. (PDF) [file pcbi.1002638.s019.pdf]

The numbers represent the rank of PWM that matches the expected database PWM.

[illegible]

|                                                  |       |   |   |     |     |   |     |   |   |   |   |   |
|--------------------------------------------------|-------|---|---|-----|-----|---|-----|---|---|---|---|---|
| c-Myc_Snyder_K562-IFNg6h                         | c-Myc | 0 | 0 | 111 | 111 | 0 | 0   | 0 | 0 | 0 | 0 | 0 |
| CTCF_Bernstein_GM12878                           | CTCF  | 0 | 0 | 0   | 111 | 0 | 0   | 0 | 0 | 0 | 0 | 0 |
| CTCF_Bernstein_H1-hESC                           | CTCF  | 0 | 0 | 0   | 0   | 0 | 0   | 0 | 0 | 0 | 0 | 0 |
| CTCF_Bernstein_HeLa-S3                           | CTCF  | 0 | 0 | 0   | 0   | 0 | 0   | 1 | 0 | 0 | 0 | 0 |
| CTCF_Bernstein_HepG2                             | CTCF  | 0 | 0 | 0   | 0   | 0 | 0   | 0 | 0 | 0 | 0 | 0 |
| CTCF_Bernstein_HMEC                              | CTCF  | 0 | 0 | 1   | 0   | 0 | 0   | 1 | 0 | 0 | 0 | 0 |
| CTCF_Bernstein_HSMM                              | CTCF  | 0 | 0 | 1   | 0   | 0 | 0   | 0 | 0 | 0 | 0 | 0 |
| CTCF_Bernstein_HUVEC                             | CTCF  | 0 | 0 | 0   | 0   | 0 | 0   | 0 | 0 | 0 | 0 | 0 |
| CTCF_Bernstein_K562                              | CTCF  | 0 | 0 | 0   | 0   | 0 | 0   | 0 | 0 | 0 | 0 | 0 |
| CTCF_Bernstein_NHEK                              | CTCF  | 0 | 0 | 1   | 0   | 0 | 0   | 0 | 0 | 0 | 0 | 0 |
| CTCF_Bernstein_NHLF                              | CTCF  | 0 | 0 | 0   | 0   | 0 | 0   | 0 | 0 | 0 | 0 | 0 |
| CTCF_Crawford_Gliobla                            | CTCF  | 0 | 0 | 0   | 0   | 0 | 0   | 0 | 0 | 0 | 0 | 0 |
| CTCF_Crawford_GM12878                            | CTCF  | 0 | 0 | 0   | 0   | 0 | 0   | 0 | 0 | 0 | 0 | 0 |
| CTCF_Crawford_HeLa-S3                            | CTCF  | 0 | 0 | 0   | 0   | 0 | 0   | 0 | 0 | 0 | 0 | 0 |
| CTCF_Crawford_HepG2                              | CTCF  | 0 | 0 | 1   | 0   | 0 | 0   | 0 | 0 | 0 | 0 | 0 |
| CTCF_Crawford_HUVEC                              | CTCF  | 0 | 0 | 1   | 0   | 0 | 0   | 0 | 0 | 0 | 0 | 0 |
| CTCF_Crawford_K562                               | CTCF  | 0 | 0 | 0   | 1   | 0 | 0   | 0 | 0 | 0 | 0 | 0 |
| CTCF_Crawford_MCF-7                              | CTCF  | 0 | 0 | 0   | 0   | 0 | 0   | 1 | 0 | 0 | 0 | 0 |
| CTCF_Crawford_MCF-7-estrogen                     | CTCF  | 0 | 0 | 0   | 111 | 0 | 0   | 0 | 0 | 0 | 0 | 0 |
| CTCF_Crawford_MCF-7-vehicle                      | CTCF  | 0 | 0 | 0   | 0   | 0 | 0   | 0 | 0 | 0 | 0 | 0 |
| CTCF--SC-5916-PCR1x_Myers_A549-EtOH-0.02pct      | CTCF  | 0 | 0 | 0   | 0   | 0 | 111 | 0 | 0 | 0 | 0 | 0 |
| CTCF--SC-5916-v041610.1_Myers_HepG2              | CTCF  | 0 | 0 | 0   | 0   | 0 | 111 | 0 | 0 | 0 | 0 | 0 |
| CTCF--SC-5916-v041610.2_Myers_H1-hESC            | CTCF  | 0 | 0 | 0   | 0   | 0 | 111 | 1 | 0 | 0 | 0 | 0 |
| CTCF--SC-5916-v041610.2_Myers_T-47D-DMSO-0.02pct | CTCF  | 0 | 0 | 0   | 0   | 0 | 111 | 0 | 0 | 0 | 0 | 0 |
| CTCF_Stam_AG04449                                | CTCF  | 0 | 0 | 0   | 0   | 0 | 0   | 0 | 0 | 0 | 0 | 0 |
| CTCF_Stam_AG04450                                | CTCF  | 0 | 0 | 0   | 0   | 0 | 0   | 0 | 0 | 0 | 0 | 0 |
| CTCF_Stam_AG09309                                | CTCF  | 0 | 0 | 1   | 0   | 0 | 0   | 0 | 0 | 0 | 0 | 0 |
| CTCF_Stam_AG09319                                | CTCF  | 0 | 0 | 0   | 0   | 0 | 0   | 0 | 0 | 0 | 0 | 0 |
| CTCF_Stam_AG10803                                | CTCF  | 0 | 0 | 1   | 0   | 0 | 0   | 0 | 0 | 0 | 0 | 0 |
| CTCF_Stam_AoAF                                   | CTCF  | 0 | 0 | 0   | 0   | 0 | 0   | 0 | 0 | 0 | 0 | 0 |
| CTCF_Stam_BJ                                     | CTCF  | 0 | 0 | 1   | 0   | 0 | 0   | 0 | 0 | 0 | 0 | 0 |
| CTCF_Stam_GM12878                                | CTCF  | 0 | 0 | 0   | 111 | 0 | 0   | 0 | 0 | 0 | 0 | 0 |
| CTCF_Stam_HA-sp                                  | CTCF  | 0 | 0 | 1   | 0   | 0 | 0   | 0 | 0 | 0 | 0 | 0 |
| CTCF_Stam_HBMEC                                  | CTCF  | 0 | 0 | 1   | 0   | 0 | 0   | 0 | 0 | 0 | 0 | 0 |
| CTCF_Stam_HCFaa                                  | CTCF  | 0 | 0 | 1   | 0   | 0 | 0   | 0 | 0 | 0 | 0 | 0 |

[illegible]

|                                                  |       |     |     |     |     |     |     |     |     |     |     |     |
|--------------------------------------------------|-------|-----|-----|-----|-----|-----|-----|-----|-----|-----|-----|-----|
| v041610.1_Myers_HepG2                            |       |     |     |     |     |     |     |     |     |     |     |     |
| FOXA1--SC-6553-v041610.1_Myers_HepG2             | FOXA1 | 0   | 0   | 0   | 0   | 0   | 0   | 0   | 0   | 0   | 0   | 0   |
| FOXA2--SC-6554-v041610.1_Myers_HepG2             | FOXA2 | 0   | 0   | 0   | 0   | 0   | 0   | 0   | 0   | 0   | 0   | 0   |
| GABP-PCR1x_Myers_HeLa-S3                         | GABP  | 0   | 0   | 0   | 0   | 0   | 0   | 0   | 0   | 0   | 0   | 0   |
| GABP-PCR2x_Myers_GM12878                         | GABP  | 0   | 0   | 0   | 0   | 0   | 0   | 0   | 0   | 0   | 0   | 0   |
| GABP-PCR2x_Myers_HepG2                           | GABP  | 0   | 0   | 0   | 0   | 0   | 0   | 0   | 0   | 0   | 0   | 0   |
| GABP-v041610.1_Myers_K562                        | GABP  | 0   | 0   | 0   | 0   | 0   | 0   | 0   | 0   | 0   | 0   | 0   |
| GATA-1_Snyder_K562b                              | GATA1 | 0   | 0   | 0   | 111 | 0   | 0   | 0   | 0   | 111 | 0   | 0   |
| GATA2-eGFP_White_K562                            | GATA2 | 0   | 0   | 0   | 0   | 0   | 111 | 0   | 0   | 0   | 0   | 0   |
| GATA2--SC-267-PCR1x_Myers_K562                   | GATA2 | 0   | 1   | 0   | 0   | 0   | 111 | 111 | 0   | 0   | 111 | 111 |
| GATA-2_Snyder_K562b                              | GATA2 | 0   | 0   | 0   | 111 | 0   | 111 | 0   | 0   | 0   | 0   | 0   |
| GATA3--SC-268-v041610.2_Myers_T-47D-DMSO-0.02pct | GATA3 | 0   | 0   | 0   | 111 | 17  | 111 | 111 | 111 | 111 | 111 | 111 |
| GR-PCR1x_Myers_A549-DEX-500pM                    | GR    | 2   | 0   | 2   | 4   | 2   | 111 | 111 | 0   | 111 | 0   | 0   |
| GR-PCR1x_Myers_A549-DEX-50nM                     | GR    | 0   | 0   | 1   | 0   | 0   | 0   | 0   | 0   | 0   | 0   | 111 |
| GR-PCR1x_Myers_A549-DEX-5nM                      | GR    | 0   | 0   | 0   | 0   | 0   | 111 | 111 | 0   | 0   | 0   | 0   |
| GR-PCR2x_Myers_A549-DEX-100nM                    | GR    | 0   | 0   | 0   | 111 | 0   | 111 | 0   | 0   | 0   | 0   | 0   |
| GR-v041610.2_Myers_ECC-1-DEX-100nM               | GR    | 1   | 0   | 0   | 0   | 0   | 0   | 111 | 0   | 0   | 0   | 0   |
| HEY1-PCR1x_Myers_K562                            | HEY1  | 111 | 111 | 111 | 111 | 111 | 111 | 111 | 111 | 111 | 111 | 111 |
| HEY1-v041610.1_Myers_HepG2                       | HEY1  | 111 | 111 | 111 | 111 | 111 | 111 | 111 | 111 | 111 | 111 | 111 |
| HNF4A--SC-8987-v041610.1_Myers_HepG2             | HNF4A | 0   | 0   | 1   | 0   | 0   | 0   | 0   | 0   | 0   | 0   | 0   |
| HNF4A_Snyder_HepG2-forskolin                     | HNF4A | 0   | 0   | 1   | 0   | 0   | 0   | 0   | 0   | 0   | 0   | 0   |
| HNF4G--SC-6558-v041610.1_Myers_HepG2             | HNF4G | 0   | 0   | 1   | 0   | 0   | 0   | 0   | 0   | 0   | 0   | 0   |
| HSF1_Snyder_HepG2-forskolin                      | HSF1  | 0   | 0   | 0   | 0   | 5   | 0   | 0   | 0   | 111 | 111 | 111 |
| IRF4-PCR1x_Myers_GM12878                         | IRF4  | 1   | 0   | 111 | 0   | 0   | 111 | 111 | 0   | 0   | 111 | 111 |
| IRF4--SC-6059-PCR1x_Myers_GM12878                | IRF4  | 1   | 0   | 111 | 6   | 0   | 111 | 111 | 0   | 0   | 111 | 111 |
| JunB-eGFP_White_K562                             | JunB  | 0   | 0   | 0   | 0   | 0   | 0   | 0   | 0   | 0   | 0   | 0   |
| JunD-eGFP_White_K562                             | JunD  | 0   | 0   | 0   | 0   | 0   | 0   | 0   | 0   | 0   | 0   | 0   |
| JunD-PCR1x_Myers_HepG2                           | JunD  | 0   | 0   | 0   | 0   | 0   | 0   | 0   | 0   | 0   | 0   | 0   |
| JunD_Snyder_                                     | JunD  | 0   | 0   | 1   | 0   | 0   | 0   | 111 | 0   | 0   | 0   | 0   |

[illegible]

|                                         |          |     |     |     |     |     |     |     |     |     |     |     |
|-----------------------------------------|----------|-----|-----|-----|-----|-----|-----|-----|-----|-----|-----|-----|
| NRSF-v041610.2_Myers_H1-hESC            | NRSF     | 0   | 0   | 0   | 0   | 0   | 0   | 0   | 0   | 0   | 0   | 0   |
| NRSF-v041610.2_Myers_K562               | NRSF     | 0   | 0   | 0   | 0   | 0   | 0   | 0   | 0   | 0   | 0   | 0   |
| PAX5-C20-PCR1x_Myers_GM12878            | PAX5-C20 | 0   | 0   | 1   | 111 | 16  | 0   | 111 | 0   | 0   | 0   | 111 |
| PAX5-C20-v041610.1_Myers_GM12891        | PAX5-C20 | 0   | 0   | 1   | 0   | 3   | 0   | 111 | 0   | 111 | 0   | 111 |
| PAX5-C20-v041610.1_Myers_GM12892        | PAX5-C20 | 0   | 0   | 1   | 111 | 111 | 0   | 111 | 0   | 111 | 0   | 111 |
| PAX5-N19-PCR1x_Myers_GM12878            | PAX5-N19 | 111 | 0   | 111 | 2   | 24  | 0   | 111 | 0   | 111 | 0   | 111 |
| Pbx3-PCR1x_Myers_GM12878                | Pbx3     | 111 | 111 | 10  | 111 | 111 | 111 | 111 | 111 | 111 | 111 | 111 |
| POU2F2-PCR1x_Myers_GM12878              | POU2F2   | 0   | 0   | 0   | 0   | 0   | 0   | 1   | 111 | 111 | 0   | 0   |
| POU2F2-PCR1x_Myers_GM12891              | POU2F2   | 0   | 0   | 0   | 0   | 0   | 0   | 0   | 0   | 111 | 0   | 0   |
| POU5F1--SC-9081-v041610.2_Myers_H1-hESC | POU5F1   | 0   | 0   | 0   | 0   | 0   | 0   | 0   | 0   | 0   | 0   | 0   |
| PU.1-PCR1x_Myers_GM12878                | PU.1     | 0   | 0   | 0   | 0   | 0   | 0   | 0   | 0   | 0   | 0   | 0   |
| PU.1-PCR1x_Myers_GM12891                | PU.1     | 0   | 0   | 111 | 0   | 0   | 0   | 0   | 0   | 0   | 0   | 0   |
| PU.1-PCR1x_Myers_K562                   | PU.1     | 0   | 0   | 0   | 0   | 0   | 0   | 0   | 0   | 0   | 0   | 0   |
| RXRA-PCR1x_Myers_HepG2                  | RXRA     | 0   | 0   | 0   | 0   | 0   | 111 | 0   | 0   | 0   | 0   | 0   |
| RXRA-v041610.2_Myers_H1-hESC            | RXRA     | 0   | 0   | 0   | 0   | 15  | 111 | 111 | 0   | 111 | 0   | 111 |
| SIX5-PCR1x_Myers_K562                   | SIX5     | 111 | 111 | 111 | 111 | 111 | 111 | 111 | 111 | 111 | 111 | 111 |
| SP1-PCR1x_Myers_GM12878                 | SP1      | 111 | 3   | 111 | 111 | 12  | 111 | 111 | 111 | 111 | 111 | 111 |
| SP1-PCR1x_Myers_HepG2                   | SP1      | 111 | 3   | 111 | 111 | 0   | 111 | 111 | 111 | 0   | 111 | 111 |
| SP1-PCR1x_Myers_K562                    | SP1      | 1   | 3   | 111 | 111 | 3   | 111 | 111 | 0   | 0   | 111 | 111 |
| SREBP1_Snyder_HepG2-insulin             | SREBP1   | 111 | 2   | 111 | 3   | 111 | 111 | 111 | 111 | 111 | 111 | 111 |
| SREBP1_Snyder_HepG2-pravastatin         | SREBP1   | 0   | 1   | 3   | 0   | 18  | 111 | 1   | 111 | 111 | 111 | 111 |
| SREBP2_Snyder_HepG2-pravastatin         | SREBP2   | 1   | 1   | 111 | 7   | 11  | 111 | 1   | 111 | 111 | 111 | 111 |
| SRF-PCR1x_Myers_H1-hESC                 | SRF      | 0   | 0   | 0   | 0   | 0   | 0   | 1   | 0   | 111 | 0   | 0   |
| SRF-PCR2x_Myers_GM12878                 | SRF      | 0   | 0   | 2   | 0   | 15  | 0   | 1   | 0   | 111 | 0   | 0   |
| SRF-v041610.1_Myers_GM12878             | SRF      | 0   | 0   | 1   | 0   | 14  | 0   | 2   | 0   | 111 | 0   | 0   |
| SRF-v041610.1_Myers_HepG2               | SRF      | 0   | 0   | 0   | 0   | 0   | 0   | 2   | 0   | 0   | 0   | 0   |
| SRF-v041610.1_Myers_K562                | SRF      | 0   | 0   | 2   | 0   | 11  | 0   | 1   | 0   | 111 | 0   | 0   |
| STAT1_Snyder_HeLa-S3-IFNg30             | STAT1    | 0   | 0   | 0   | 0   | 0   | 0   | 0   | 0   | 0   | 0   | 0   |
| STAT1_Snyder_K562-IFNa30                | STAT1    | 0   | 0   | 0   | 0   | 0   | 0   | 9   | 0   | 0   | 0   | 0   |
| STAT1_Snyder_K562-IFNa6h                | STAT1    | 0   | 0   | 1   | 0   | 0   | 0   | 0   | 0   | 0   | 0   | 0   |

|                                          |        |     |     |     |     |     |     |     |     |     |     |     |
|------------------------------------------|--------|-----|-----|-----|-----|-----|-----|-----|-----|-----|-----|-----|
| STAT1_Snyder_K562-IFNg30                 | STAT1  | 0   | 0   | 0   | 0   | 0   | 0   | 0   | 0   | 0   | 0   | 0   |
| STAT1_Snyder_K562-IFNg6h                 | STAT1  | 0   | 0   | 0   | 0   | 0   | 0   | 0   | 0   | 0   | 0   | 111 |
| STAT2_Snyder_K562-IFNa30                 | STAT2  | 1   | 1   | 2   | 111 | 4   | 0   | 5   | 111 | 111 | 111 | 111 |
| STAT2_Snyder_K562-IFNa6h                 | STAT2  | 111 | 5   | 111 | 111 | 19  | 111 | 111 | 111 | 111 | 111 | 111 |
| TCF12-PCR1x_Myers_GM12878                | TCF12  | 0   | 0   | 0   | 0   | 0   | 0   | 0   | 0   | 0   | 0   | 0   |
| TCF12-PCR1x_Myers_HepG2                  | TCF12  | 111 | 8   | 111 | 111 | 111 | 111 | 111 | 111 | 111 | 111 | 111 |
| TCF4_Snyder_HCT-116                      | TCF4   | 0   | 0   | 0   | 111 | 1   | 0   | 0   | 0   | 111 | 0   | 111 |
| USF-1-PCR1x_Myers_A549-EtOH-0.02pct      | USF-1  | 0   | 0   | 0   | 0   | 0   | 0   | 0   | 0   | 0   | 0   | 0   |
| USF-1-PCR1x_Myers_H1-hESC                | USF-1  | 0   | 0   | 0   | 0   | 0   | 0   | 0   | 0   | 0   | 0   | 0   |
| USF-1-PCR1x_Myers_HepG2                  | USF-1  | 0   | 0   | 0   | 0   | 0   | 0   | 0   | 0   | 0   | 0   | 0   |
| USF-1-PCR2x_Myers_GM12878                | USF-1  | 0   | 0   | 0   | 0   | 0   | 0   | 0   | 0   | 0   | 0   | 0   |
| USF1--SC-8983-v041610.2_Myers_SK-N-SH-RA | USF-1  | 0   | 0   | 0   | 0   | 0   | 0   | 0   | 0   | 0   | 0   | 0   |
| USF-1-v041610.1_Myers_K562               | USF-1  | 0   | 0   | 0   | 0   | 0   | 0   | 0   | 0   | 0   | 0   | 0   |
| YY1--SC-281-v041610.1_Myers_GM12891      | YY1    | 0   | 111 | 0   | 0   | 111 | 111 | 111 | 111 | 111 | 111 | 111 |
| YY1--SC-281-v041610.2_Myers_H1-hESC      | YY1    | 0   | 111 | 0   | 0   | 111 | 111 | 0   | 111 | 111 | 111 | 111 |
| YY1--SC-281-v041610.2_Myers_SK-N-SH-RA   | YY1    | 0   | 4   | 0   | 0   | 0   | 111 | 111 | 111 | 111 | 111 | 111 |
| YY1_Snyder_GM12878                       | YY1    | 0   | 111 | 0   | 0   | 111 | 111 | 0   | 111 | 111 | 111 | 111 |
| YY1_Snyder_K562b                         | YY1    | 0   | 111 | 0   | 0   | 111 | 111 | 0   | 111 | 111 | 111 | 111 |
| YY1_Snyder_NT2-D1                        | YY1    | 0   | 111 | 0   | 0   | 111 | 111 | 0   | 111 | 111 | 111 | 111 |
| YY1-v041610.1_Myers_GM12892              | YY1    | 0   | 111 | 111 | 0   | 111 | 111 | 0   | 111 | 111 | 111 | 111 |
| YY1-v041610.1_Myers_K562                 | YY1    | 0   | 111 | 0   | 0   | 111 | 111 | 0   | 111 | 111 | 111 | 111 |
| YY1-v041610.2_Myers_K562                 | YY1    | 0   | 111 | 0   | 0   | 111 | 111 | 0   | 111 | 111 | 111 | 111 |
| ZBTB33-PCR1x_Myers_GM12878               | ZBTB33 | 111 | 111 | 111 | 111 | 111 | 111 | 111 | 111 | 111 | 111 | 111 |
| ZBTB33-PCR1x_Myers_HepG2                 | ZBTB33 | 111 | 111 | 111 | 111 | 111 | 111 | 111 | 111 | 111 | 111 | 111 |
| ZBTB33-v041610.1_Myers_HepG2             | ZBTB33 | 111 | 111 | 111 | 111 | 111 | 111 | 111 | 111 | 111 | 111 | 111 |
| ZBTB7A--SC-34508-v041610.1_Myers_K562    | ZBTB7A | 111 | 0   | 0   | 111 | 111 | 111 | 111 | 111 | 111 | 111 | 111 |
| ZEB1--SC-25388-v041610.2_Myers_GM12878   | ZEB1   | 0   | 0   | 0   | 0   | 0   | 0   | 0   | 0   | 111 | 0   | 111 |

Note: 111 indicates none of the motif discovered by that method matches expected PWM.
